# Supplementary material for: Sustainable and energy-saving hydrogen production via binder-free and in situ electrodeposited Ni–Mn–S nanowires on Ni–Cu 3-D substrates
Source: Royal Society of Chemistry journal article supplement (doi:10.1039/d4nr03486d), 2024-11-25
Supplement: d4nr03486d1.pdf [file d4nr03486d1.pdf]

**Supporting information for**  
**Sustainable and Energy-Saving Hydrogen Production via Binder-free and In-situ**  
**Electrodeposited Ni-Mn-S Nanowires on Ni-Cu 3-D Substrate**

Ghasem Barati Darband<sup>a\*</sup>, Danial Iravani<sup>b</sup>, Meiling Zhang<sup>c</sup>, Meysam Maleki<sup>d</sup>, Shanrui Huang<sup>c</sup>,  
Reza Andaveh<sup>e</sup>, Seyyed Mehdi Khoshfetrat<sup>f</sup>, Jinyang Li<sup>c,g\*</sup>

a- Materials and Metallurgical Engineering Department, Faculty of Engineering, Ferdowsi University of Mashhad, Mashhad 91775-1111, Iran

b- Chemical Engineering Department, Faculty of Engineering, Ferdowsi University of Mashhad, Mashhad, Iran

c- School of Chemistry, Key Laboratory of Advanced Technologies of Materials (Ministry of Education), Southwest Jiaotong University, Chengdu 610031, China

d- Department of Chemical and Materials Engineering, Concordia University, Montreal, Quebec H4B 1R6, Canada

e- Department of Mechanical and Materials Engineering, University of Western Ontario, London, Ontario, N6A 5B9 Canada

f- Department of Chemistry, Faculty of Basic Science, Ayatollah Boroujerdi University, Borujerd, Iran

g- Yibin Institute of Southwest Jiaotong University, Yibin 644000, China

\* Corresponding authors

Ghasem Barati Darband: [baratidarband@um.ac.ir](mailto:baratidarband@um.ac.ir)

Jinyang Li: [jinyang.li@swjtu.edu.cn](mailto:jinyang.li@swjtu.edu.cn).

Table S1: Composition of electrolyte for deposition of Ni-Cu nano-micro dendrites

| <b>Materials</b>                      | <b>Concentration (M)</b> |
|---------------------------------------|--------------------------|
| NiSO <sub>4</sub> .6 H <sub>2</sub> O | 0.5                      |
| CuSO <sub>4</sub> .5 H <sub>2</sub> O | 0.01                     |
| HCl                                   | 1                        |
| H <sub>2</sub> SO <sub>4</sub>        | 1.5                      |

Table S2: Composition of electrolyte for deposition of Ni-Cu nano-micro dendrites

| <b>Materials</b>                      | <b>Concentration</b> |
|---------------------------------------|----------------------|
| NiCl <sub>2</sub> .6 H <sub>2</sub> O | 5 mM                 |
| MnCl <sub>2</sub> .4 H <sub>2</sub> O | 5 mM                 |
| H <sub>2</sub> NCSNH <sub>2</sub>     | 0.075 M              |

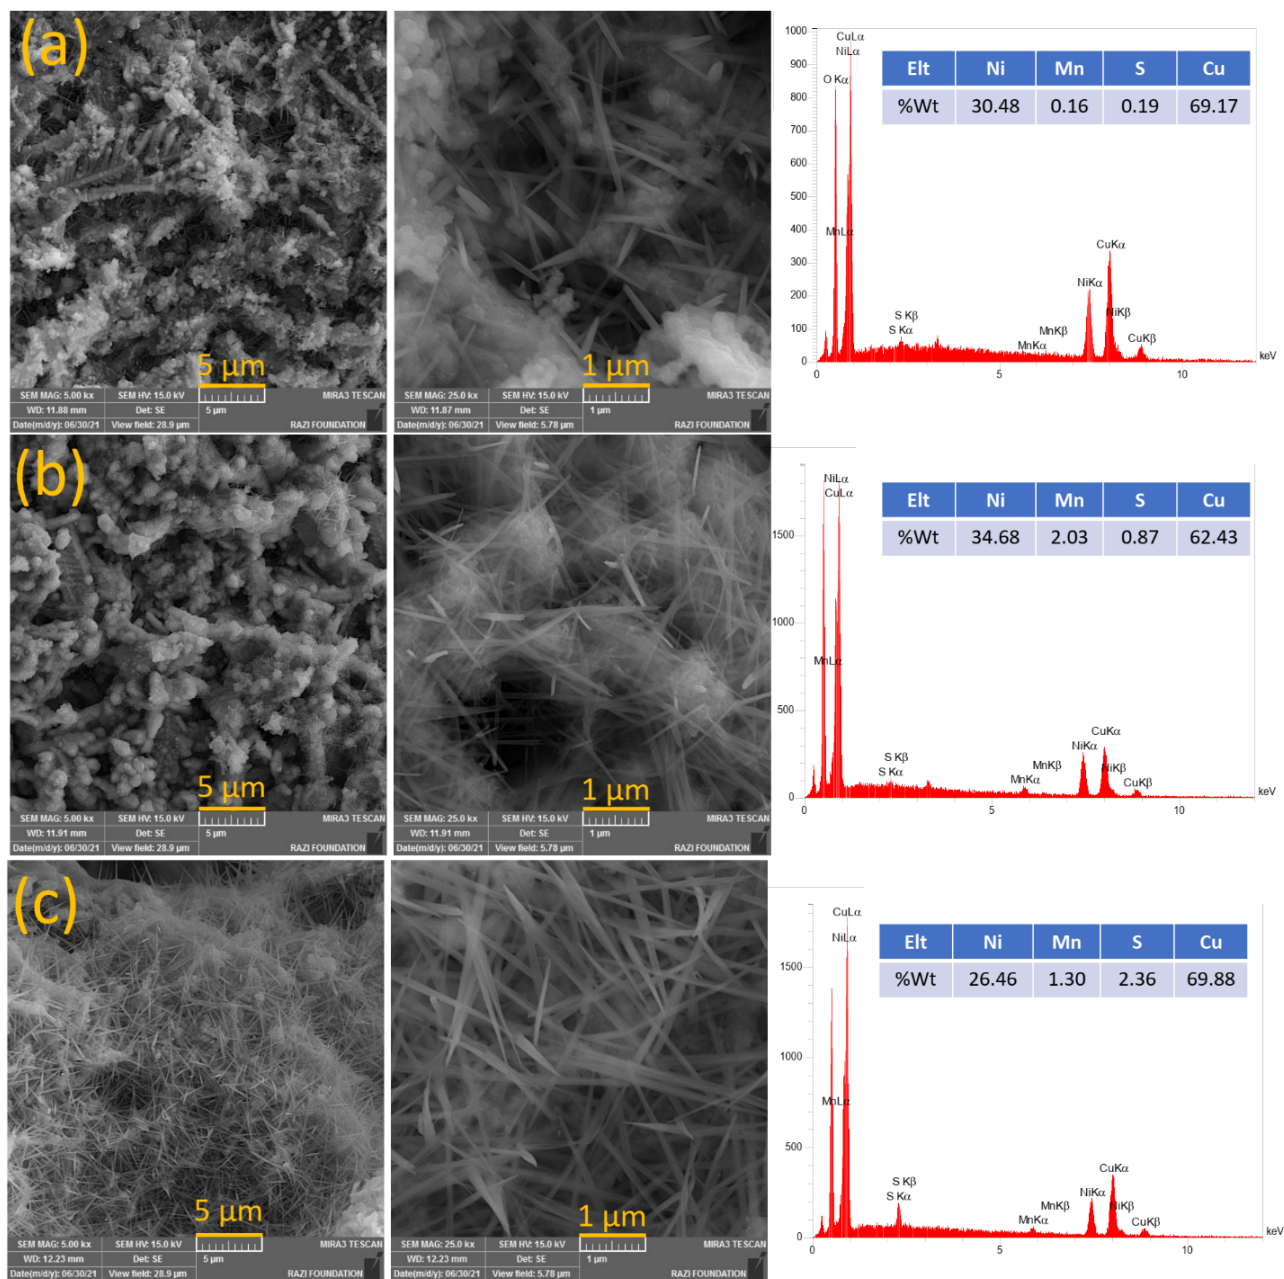

Fig. S1. FESEM and EDX images of Ni-Mn-S/Ni-Cu samples fabricated at different coating cycles: (a) 3, (b) 5, and (c) 20 cycles.

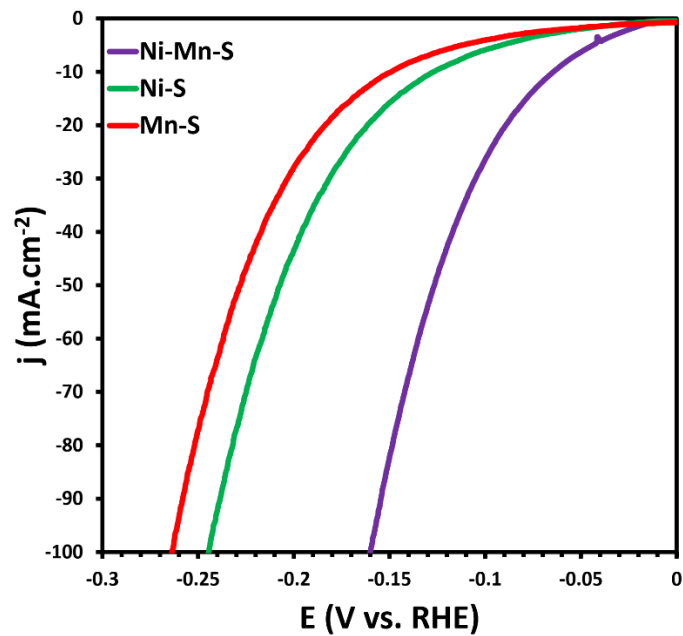

Figure S2: LSV curves of different electrodes.

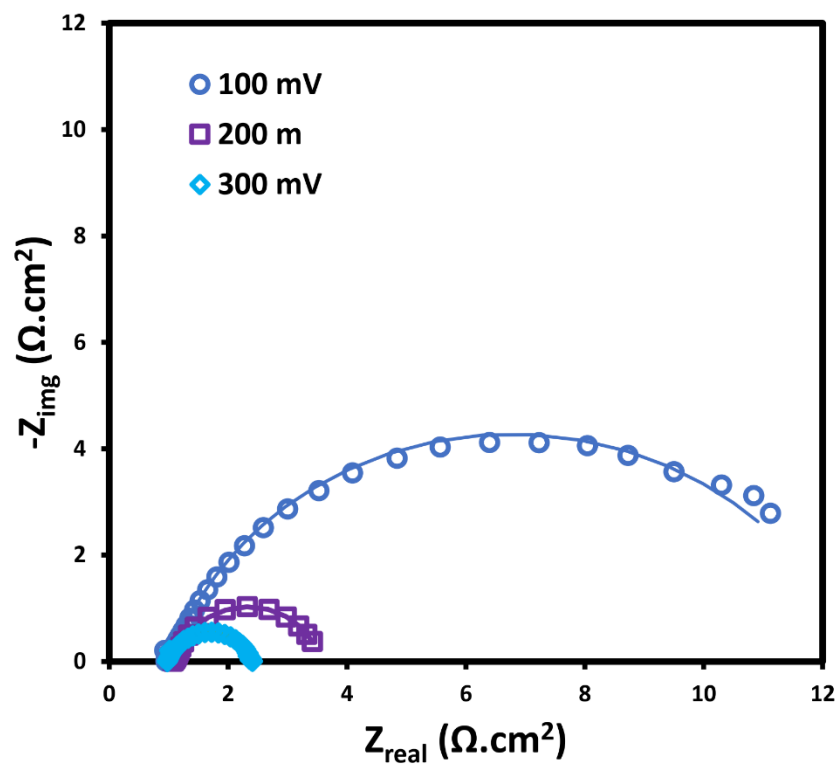

Figure S3: Nyquist curves at different overpotentials of optimized electrode.

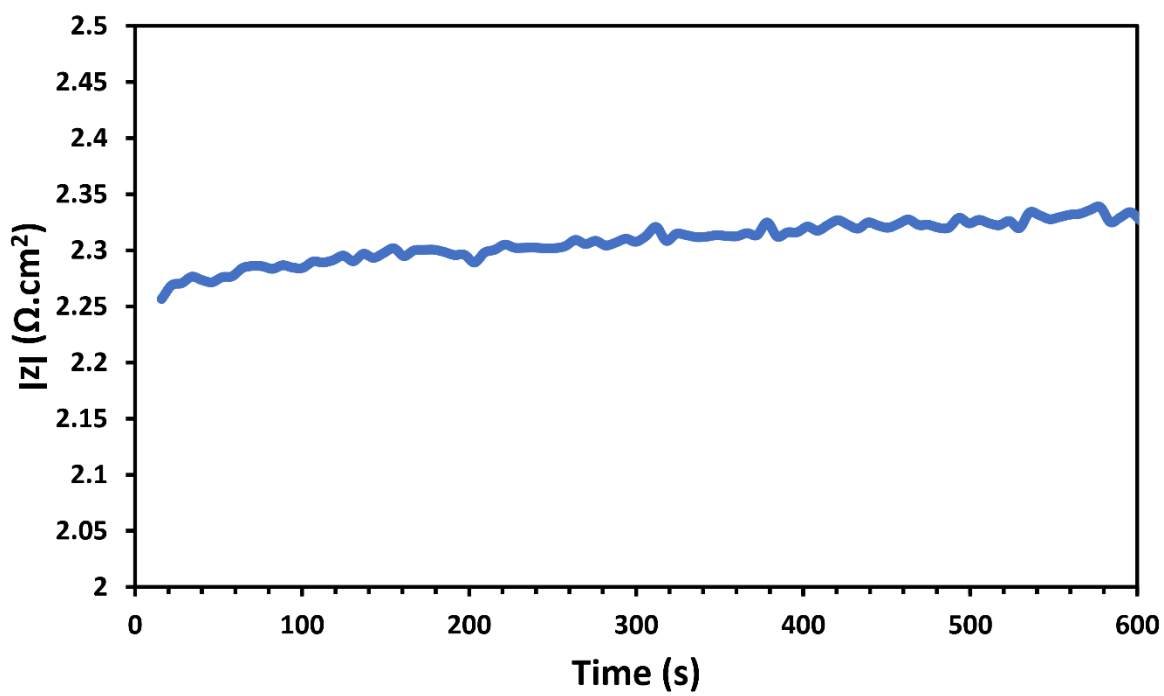

Figure S4: dynamic specific resistance at fixed frequency.

Table S3: Comparison of HER properties for different electrocatalysts in 1.0 M KOH solution.

| Catalyst                                     | Substrate | Tafel slope (mV<br>dec <sup>-1</sup> ) | Overpotential (mV) | Stability                           | Ref.         |
|----------------------------------------------|-----------|----------------------------------------|--------------------|-------------------------------------|--------------|
| Mo-NiSx/NF                                   | NF        | 88.0                                   | $\eta_{10} = 155$  | 50 h at 10 mA<br>cm <sup>-2</sup>   | [1]          |
| V-Ni <sub>3</sub> N                          | NF        | 28.7                                   | $\eta_{10} = 15$   | 24 h at 10 mA<br>cm <sup>-2</sup>   | [2]          |
| NiCu/NiMn(OH) <sub>2</sub>                   | NF        | 31.0                                   | $\eta_{10} = 17$   | 50 h at 10 mA<br>cm <sup>-2</sup>   | [3]          |
| S-Ni@Ni(OH) <sub>2</sub> /NF                 | NF        | 74.0                                   | $\eta_{10} = 50$   | 15 h at 80 mV                       | [4]          |
| Ni-Co-Fe-P                                   | NF        | 67.0                                   | $\eta_{10} = 64$   | 100 h at 100 mA<br>cm <sup>-2</sup> | [5]          |
| MnCo/NiSe                                    | NF        | 45.1                                   | $\eta_{10} = 22$   | 200 h at 500 mA<br>cm <sup>-2</sup> | [6]          |
| NiMo@Ni(OH) <sub>2</sub> MoOx                | GR        | 115.0                                  | $\eta_{100} = 160$ | 24 h at 100 mA<br>cm <sup>-2</sup>  | [7]          |
| NiCoSeP                                      | NF        | 59.0                                   | $\eta_{10} = 52$   | 15 h at 500 mA<br>cm <sup>-2</sup>  | [8]          |
| P-doped NiSe                                 | NF        | 117.0                                  | $\eta_{10} = 90$   | 100 h at 100 mA<br>cm <sup>-2</sup> | [9]          |
| Nanoporous Ni-Se                             | GR        | 126.0                                  | $\eta_{10} = 100$  | 12 h at 100 mA<br>cm <sup>-2</sup>  | [10]         |
| Ni-P/Ni(OH) <sub>2</sub> NTs                 | NF        | 58.0                                   | $\eta_{10} = 55$   | 30 h at 10 mA<br>cm <sup>-2</sup>   | [11]         |
| NiMn <sub>1.5</sub> PO <sub>4</sub> /NF      | NF        | 43.0                                   | $\eta_{10} = 72$   | 50 h at 10 mA<br>cm <sup>-2</sup>   | [12]         |
| O-NiCoP/Ni <sub>2</sub> P                    | NF        | 68.8                                   | $\eta_{10} = 58$   | 24 h at 10 mA<br>cm <sup>-2</sup>   | [13]         |
| Ni-Mo-O/Ni <sub>4</sub> Mo@NC                | CP        | 99.0                                   | $\eta_{10} = 61$   | 15 h at 10 mA<br>cm <sup>-2</sup>   | [14]         |
| V-doped NiSe/Ni <sub>3</sub> Se <sub>2</sub> | NF        | 70.0                                   | $\eta_{100} = 175$ | 11 h at 100 mA<br>cm <sup>-2</sup>  | [15]         |
| NiSe <sub>2</sub> -Ni <sub>2</sub> P/NF      | NF        | 68.0                                   | $\eta_{10} = 102$  | 25 h at 150 mV                      | [16]         |
| Ni-Mn-S/Ni-Cu/10                             | NF        | 81.0                                   | $\eta_{10} = 64$   | 24 h at 100 mA<br>cm <sup>-2</sup>  | This<br>work |

Table S4: Comparison of UOR properties for different electrocatalysts.

| Catalyst                                                    | Substrate | Solution                | Tafel slope (mV dec <sup>-1</sup> ) | Potential vs. RHE (V)   | Stability                        | Ref.      |
|-------------------------------------------------------------|-----------|-------------------------|-------------------------------------|-------------------------|----------------------------------|-----------|
| Co <sub>2</sub> P/NiMoO <sub>4</sub> /NF                    | NF        | 1.0 M KOH + 0.50 M urea | 75.0                                | E <sub>10</sub> = 1.34  | 50 h at 1.37 V                   | [17]      |
| Ni <sub>3</sub> N/Mo <sub>2</sub> N                         | NF        | 1.0 M KOH + 0.33 M urea | 34.7                                | E <sub>100</sub> = 1.36 | 40 h at 120 mA cm <sup>-2</sup>  | [18]      |
| Ni-Mn-Se                                                    | NF        | 1.0 M KOH + 0.33 M urea | 58.2                                | E <sub>100</sub> = 1.44 | 50 h at 200 mA cm <sup>-2</sup>  | [19]      |
| W-NiS <sub>2</sub> /MoO <sub>2</sub> @CC                    | CC        | 1.0 M KOH + 0.33 M urea | 24.1                                | E <sub>10</sub> = 1.30  | 24 h at 1.40 V                   | [20]      |
| NF/PPY <sub>700</sub> -Ni <sub>3</sub> S <sub>2</sub> -8-Ar | NF        | 1.0 M KOH + 0.33 M urea | 20.0                                | E <sub>20</sub> = 1.35  | 12 h at 20 mA cm <sup>-2</sup>   | [21]      |
| FeNi <sub>3</sub> -MoO <sub>2</sub> /NF                     | NF        | 1.0 M KOH + 0.50 M urea | 30.1                                | E <sub>10</sub> = 1.29  | 120 h at 500 mA cm <sup>-2</sup> | [22]      |
| Mo-doped Ni <sub>3</sub> S <sub>2</sub>                     | NF        | 1.0 M KOH + 0.30 M urea | 28.1                                | E <sub>10</sub> = 1.33  | 120 h at 10 mA cm <sup>-2</sup>  | [23]      |
| Ni <sub>9</sub> S <sub>8</sub> /CuS/Cu <sub>2</sub> O       | NF        | 1.0 M KOH + 0.33 M urea | 64.0                                | E <sub>10</sub> = 1.36  | 20 h at 1.36 V                   | [24]      |
| NiCo <sub>2</sub> S <sub>4</sub> /CC                        | CC        | 1.0 M KOH + 0.33 M urea | 172.0                               | E <sub>50</sub> = 1.43  | 10 h at 1.37 V                   | [25]      |
| NiCo-BDC/Ni-S                                               | NF        | 1.0 M KOH + 0.33 M urea | 58.2                                | E <sub>10</sub> = 1.31  | 52 h at 10 mA cm <sup>-2</sup>   | [26]      |
| P-CoS <sub>x</sub> (OH) <sub>y</sub> NN/Ti                  | TM        | 1.0 M KOH + 0.50 M urea | 104.0                               | E <sub>10</sub> = 1.30  | 40 h at 1.48 V                   | [27]      |
| Ni(OH) <sub>2</sub> @NF                                     | NF        | 1.0 M KOH + 0.30 M urea | 24.4                                | E <sub>10</sub> = 1.35  | 40 h at 10 mA cm <sup>-2</sup>   | [28]      |
| Ni <sub>4</sub> N/Cu <sub>3</sub> N/CF                      | CF        | 1.0 M KOH + 0.50 M urea | 55.7                                | E <sub>10</sub> = 1.34  | 10 h at 100 mA cm <sup>-2</sup>  | [29]      |
| Ni <sub>3</sub> N/NF                                        | NF        | 1.0 M KOH + 0.50 M urea | 41.0                                | E <sub>10</sub> = 1.34  | 36 h at 1.37 V                   | [30]      |
| NiFeCo LDH/NF                                               | NF        | 1.0 M KOH + 0.33 M urea | 31.0                                | E <sub>10</sub> = 1.35  | 50 h at 10 mA cm <sup>-2</sup>   | [31]      |
| NiFe(OH) <sub>2</sub> -SD/NF                                | NF        | 1.0 M KOH + 0.50 M urea | 41.0                                | E <sub>10</sub> = 1.32  | 24 h at 10 mA cm <sup>-2</sup>   | [32]      |
| Ni-Mn-S/Ni-Cu/10                                            | NF        | 1.0 M KOH + 0.33 M urea | 87.0                                | E <sub>10</sub> = 1.247 | 24 h at 100 mA cm <sup>-2</sup>  | This work |

Table S5: Comparison of overall urea electrolysis properties for different electrocatalysts.

| Catalyst                                                    | Substrate | Solution                | Cell potential vs. RHE (V) | Stability                       | Ref.      |
|-------------------------------------------------------------|-----------|-------------------------|----------------------------|---------------------------------|-----------|
| Ni <sub>3</sub> N/Mo <sub>2</sub> N                         | NF        | 1.0 M KOH + 0.33 M urea | $\Delta E_{10} = 1.36$     | 50 h at 10 mA cm <sup>-2</sup>  | [18]      |
| Ni-Mn-Se                                                    | NF        | 1.0 M KOH + 0.33 M urea | $\Delta E_{100} = 1.62$    | 50 h at 50 mA cm <sup>-2</sup>  | [19]      |
| W-NiS <sub>2</sub> /MoO <sub>2</sub> @CC                    | CC        | 1.0 M KOH + 0.33 M urea | $\Delta E_{10} = 1.37$     | 24 h at 1.40 V                  | [20]      |
| NF/PPy <sub>700</sub> -Ni <sub>3</sub> S <sub>2</sub> -8-Ar | NF        | 1.0 M KOH + 0.33 M urea | $\Delta E_{20} = 1.50$     | 20 h at 1.60 V                  | [21]      |
| FeNi <sub>3</sub> -MoO <sub>2</sub> /NF                     | NF        | 1.0 M KOH + 0.50 M urea | $\Delta E_{10} = 1.37$     | 70 h at 100 mA cm <sup>-2</sup> | [22]      |
| Mo-doped Ni <sub>3</sub> S <sub>2</sub>                     | NF        | 1.0 M KOH + 0.30 M urea | $\Delta E_{10} = 1.45$     | 120 h at 10 mA cm <sup>-2</sup> | [23]      |
| Ni <sub>9</sub> S <sub>8</sub> /CuS/Cu <sub>2</sub> O       | NF        | 1.0 M KOH + 0.33 M urea | $\Delta E_{10} = 1.47$     | 20 h at 1.47 V                  | [24]      |
| NiCo <sub>2</sub> S <sub>4</sub> /CC                        | CC        | 1.0 M KOH + 0.33 M urea | $\Delta E_{10} = 1.45$     | 15 h at 1.51 V                  | [25]      |
| NiCo-BDC/Ni-S                                               | NF        | 1.0 M KOH + 0.33 M urea | $\Delta E_{10} = 1.46$     | 50 h at 10 mA cm <sup>-2</sup>  | [26]      |
| P-CoS <sub>x</sub> (OH) <sub>y</sub> NN/Ti                  | TM        | 1.0 M KOH + 0.50 M urea | $\Delta E_{10} = 1.30$     | 40 h at 1.29 V                  | [27]      |
| Ni(OH) <sub>2</sub> @NF                                     | NF        | 1.0 M KOH + 0.30 M urea | $\Delta E_{50} = 1.45$     | 40 h at 20 mA cm <sup>-2</sup>  | [28]      |
| Ni <sub>4</sub> N/Cu <sub>3</sub> N/CF                      | CF        | 1.0 M KOH + 0.50 M urea | $\Delta E_{10} = 1.48$     | 10 h at 100 mA cm <sup>-2</sup> | [29]      |
| Ni <sub>3</sub> N/NF                                        | NF        | 1.0 M KOH + 0.50 M urea | $\Delta E_{100} = 1.42$    | 20 h at 1.37 V                  | [30]      |
| NiFeCo LDH/NF                                               | NF        | 1.0 M KOH + 0.33 M urea | $\Delta E_{10} = 1.49$     | 50 h at 10 mA cm <sup>-2</sup>  | [31]      |
| Ni(OH)S/NF                                                  | NF        | 1.0 M KOH + 0.33 M urea | $\Delta E_{10} = 1.36$     | 40 h at 20 mA cm <sup>-2</sup>  | [33]      |
| Ni-Mn-S/Ni-Cu/10                                            | NF        | 1.0 M KOH + 0.33 M urea | $\Delta E_{10} = 1.302$    | 24 h at 50 mA cm <sup>-2</sup>  | This work |



## References

1. Zhang, Y., et al., *Magnetic field-enhanced water splitting enabled by bifunctional molybdenum-doped nickel sulfide on nickel foam*. Carbon Energy, 2023. **5**(10).
2. Ma, W., et al., *Formulating a heterolytic cleavage process of water on Ni<sub>3</sub>N nanosheets through single transition metal doping for ultra-efficient alkaline hydrogen evolution*. Inorganic Chemistry Frontiers, 2023. **10**(17): p. 5152-5160.
3. Li, Z., et al., *Boosting elementary steps kinetics towards energetic alkaline hydrogen evolution via dual sites on phase-separated Ni-Cu-Mn/hydroxide*. Chemical Engineering Journal, 2023. **451**: p. 138540.
4. Huang, W., et al., *Sulfur-Modified Nickel-Based Hybrid Nanosheet as a Robust Bifunctional Electrode for Hydrogen Generation via Formaldehyde Reforming*. ACS Applied Energy Materials, 2023. **6**(13): p. 7221-7229.
5. Darband, G.B., et al., *Electrodeposition of self-supported transition metal phosphides nanosheets as efficient hydrazine-assisted electrolytic hydrogen production catalyst*. International Journal of Hydrogen Energy, 2023. **48**(11): p. 4253-4263.
6. Andaveh, R., et al., *Boosting the electrocatalytic activity of NiSe by introducing MnCo as an efficient heterostructured electrocatalyst for large-current-density alkaline seawater splitting*. Applied Catalysis B: Environmental, 2023. **325**: p. 122355.
7. Zhao, M.-J., et al., *Indirect electrodeposition of a NiMo@Ni(OH)<sub>2</sub>MoO<sub>x</sub> composite catalyst for superior hydrogen production in acidic and alkaline electrolytes*. Renewable Energy, 2022. **191**: p. 370-379.
8. Maleki, M., et al., *Highly active and durable NiCoSeP nanostructured electrocatalyst for large-current-density hydrogen production*. ACS Applied Energy Materials, 2022. **5**(3): p. 2937-2948.
9. Maleki, M., et al., *Binder-free P-doped Ni-Se nanostructure electrode toward highly active and stable hydrogen production in wide pH range and seawater*. Journal of Electroanalytical Chemistry, 2022. **916**: p. 116379.
10. Arabi, M., A. Ghaffarinejad, and G.B. Darband, *Electrodeposition of nanoporous nickel selenide on graphite rod as a bifunctional electrocatalyst for hydrogen and oxygen evolution reactions*. Journal of Electroanalytical Chemistry, 2022. **907**: p. 116066.
11. Zhao, F., et al., *Amorphous/amorphous Ni-P/Ni(OH)<sub>2</sub> heterostructure nanotubes for an efficient alkaline hydrogen evolution reaction*. Journal of Materials Chemistry A, 2021. **9**(16): p. 10169-10179.
12. Zhang, G., et al., *NiMn<sub>1.5</sub>PO<sub>4</sub> thin layer supported on Ni foam as a highly efficient bifunctional electrocatalyst for overall water splitting*. Electrochimica Acta, 2021. **367**: p. 137567.
13. Wen, Y., et al., *O doping hierarchical NiCoP/Ni<sub>2</sub>P hybrid with modulated electron density for efficient alkaline hydrogen evolution reaction*. Applied Catalysis B: Environmental, 2021. **293**: p. 120196.
14. Jin, Z., et al., *Transition metal/metal oxide interface (Ni-Mo-O/Ni<sub>4</sub>Mo) stabilized on N-doped carbon paper for enhanced hydrogen evolution reaction in alkaline conditions*. Industrial & Engineering Chemistry Research, 2021. **60**(14): p. 5145-5150.

15. He, D., et al., *Tuning the morphologic and electronic structures of self-assembled NiSe/Ni<sub>3</sub>Se<sub>2</sub> heterostructures with vanadium doping toward efficient electrocatalytic hydrogen production*. Applied Surface Science, 2021. **542**: p. 148598.
16. Wang, P., et al., *Coupling NiSe<sub>2</sub>-Ni<sub>2</sub>P heterostructure nanowrinkles for highly efficient overall water splitting*. Journal of catalysis, 2019. **377**: p. 600-608.
17. You, M., et al., *Novel trifunctional electrocatalyst of nickel foam supported Co<sub>2</sub>P/NiMoO<sub>4</sub> heterostructures for overall water splitting and urea oxidation*. Journal of Colloid and Interface Science, 2023. **648**: p. 278-286.
18. Wang, T., et al., *Interfacial engineering of Ni<sub>3</sub>N/Mo<sub>2</sub>N heterojunctions for urea-assisted hydrogen evolution reaction*. ACS Catalysis, 2023. **13**(7): p. 4091-4100.
19. Maleki, M., et al., *Mn-incorporated nickel selenide: an ultra-active bifunctional electrocatalyst for hydrogen evolution and urea oxidation reactions*. Chemical Communications, 2022. **58**(21): p. 3545-3548.
20. Fereja, S.L., et al., *W-doping induced abundant active sites in a 3D NiS<sub>2</sub>/MoO<sub>2</sub> heterostructure as an efficient electrocatalyst for urea oxidation and hydrogen evolution reaction*. Chemical Engineering Journal, 2022. **432**: p. 134274.
21. Zhang, Y., et al., *Coaxial Ni-S@N-doped carbon nanofibers derived hierarchical electrodes for efficient H<sub>2</sub> production via urea electrolysis*. ACS Applied Materials & Interfaces, 2021. **13**(3): p. 3937-3948.
22. Xu, Q., et al., *Coupling interface constructions of FeNi<sub>3</sub>-MoO<sub>2</sub> heterostructures for efficient urea oxidation and hydrogen evolution reaction*. ACS Applied Materials & Interfaces, 2021. **13**(14): p. 16355-16363.
23. Xu, H., et al., *A branch-like Mo-doped Ni<sub>3</sub>S<sub>2</sub> nanoforest as a high-efficiency and durable catalyst for overall urea electrolysis*. Journal of Materials Chemistry A, 2021. **9**(6): p. 3418-3426.
24. Wei, D., W. Tang, and Y. Wang, *Hairy sphere-like Ni<sub>9</sub>S<sub>8</sub>/CuS/Cu<sub>2</sub>O composites grown on nickel foam as bifunctional electrocatalysts for hydrogen evolution and urea electrooxidation*. International Journal of Hydrogen Energy, 2021. **46**(40): p. 20950-20960.
25. Song, W., et al., *Construction of self-supporting, hierarchically structured caterpillar-like NiCo<sub>2</sub>S<sub>4</sub> arrays as an efficient trifunctional electrocatalyst for water and urea electrolysis*. Nanoscale, 2021. **13**(3): p. 1680-1688.
26. Li, M., et al., *NiCo-BDC nanosheets coated with amorphous Ni-S thin film for high-efficiency oxygen evolution reaction and urea oxidation reaction*. FlatChem, 2021. **25**: p. 100222.
27. Jiang, Y., et al., *Porous and amorphous cobalt hydroxysulfide core-shell nanoneedles on Ti-mesh as a bifunctional electrocatalyst for energy-efficient hydrogen production via urea electrolysis*. Journal of Materials Chemistry A, 2021. **9**(9): p. 5664-5674.
28. Xia, L., et al., *In situ growth of porous ultrathin Ni(OH)<sub>2</sub> nanostructures on nickel foam: an efficient and durable catalysts for urea electrolysis*. ACS Applied Energy Materials, 2020. **3**(3): p. 2996-3004.
29. Li, J., et al., *Boosting hydrogen production by electrooxidation of urea over 3D hierarchical Ni<sub>4</sub>N/Cu<sub>3</sub>N nanotube arrays*. ACS sustainable chemistry & engineering, 2019. **7**(15): p. 13278-13285.
30. Hu, S., et al., *Ni<sub>3</sub>N/NF as bifunctional catalysts for both hydrogen generation and urea decomposition*. ACS applied materials & interfaces, 2019. **11**(14): p. 13168-13175.

31. Babar, P., et al., *Bifunctional 2D electrocatalysts of transition metal hydroxide nanosheet arrays for water splitting and urea electrolysis*. ACS sustainable chemistry & engineering, 2019. **7**(11): p. 10035-10043.
32. Babar, P., et al., *Trifunctional layered electrodeposited nickel iron hydroxide electrocatalyst with enhanced performance towards the oxidation of water, urea and hydrazine*. Journal of colloid and interface science, 2019. **557**: p. 10-17.
33. Jia, X., et al., *Amorphous Ni(III)-based sulfides as bifunctional water and urea oxidation anode electrocatalysts for hydrogen generation from urea-containing water*. Applied Catalysis B: Environmental, 2022. **312**: p. 121389.
